# Supplementary material for: Intrinsic optical properties and structural transition of CsPbCl3 revealed by temperature dependent studies of a single microplatelet
Source: Royal Society of Chemistry journal article supplement (doi:10.1039/d4tc03349c), 2024-01-01
Supplement: d4tc03349c1.pdf [file d4tc03349c1.pdf]

## Supporting Information

### Intrinsic optical property and structural transition of CsPbCl<sub>3</sub> revealed by temperature dependent studies of single microplatelet

Fangfang You, Na Dong, Xiaoting Wang, Jianping Huang, Yi Yao, Qing Zhang, Wenhua Zhang, Faqiang Xu\*

National Synchrotron Radiation Laboratory, University of Science and Technology of China, Hefei, Anhui 230029, PR China.

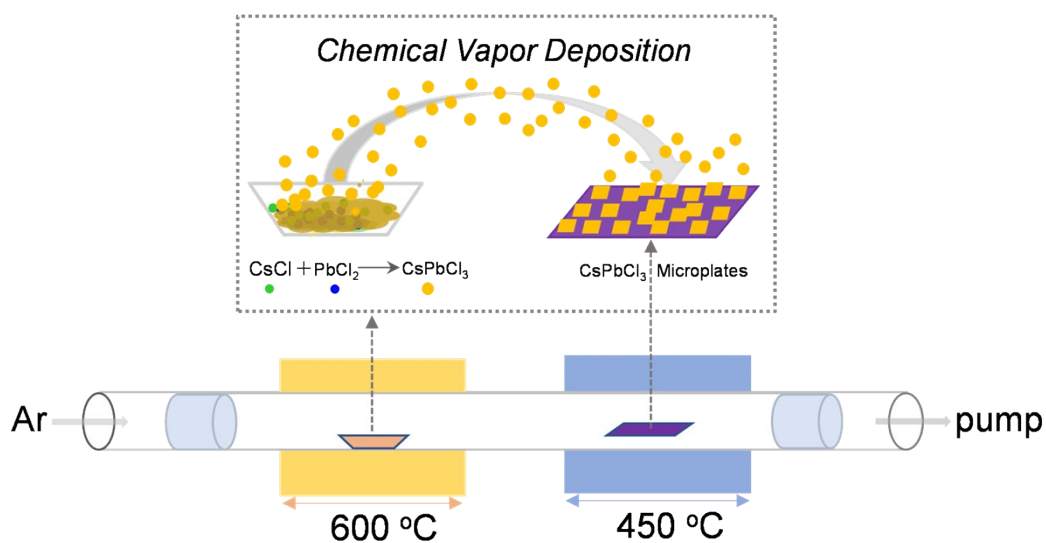

Fig. S1 Schematic illustration of fabrication of CsPbCl<sub>3</sub> MP by co-deposition method.

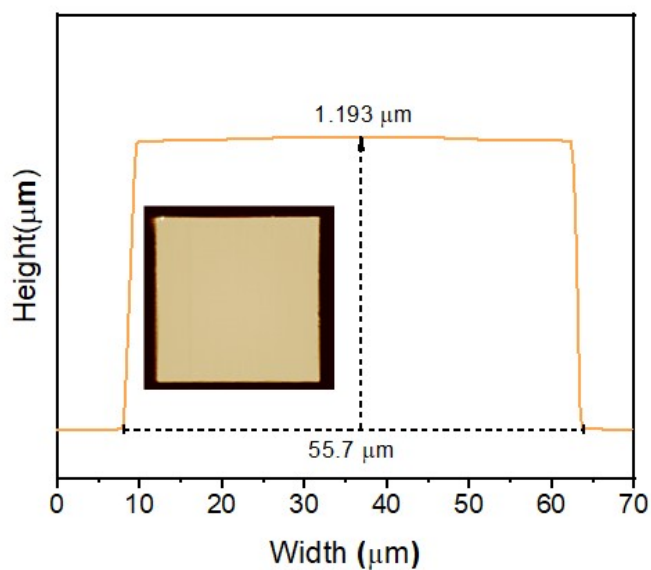

Fig. S2 The thickness and width of the CsPbCl<sub>3</sub> MP. Inset is the AFM picture of the CsPbCl<sub>3</sub> MP.

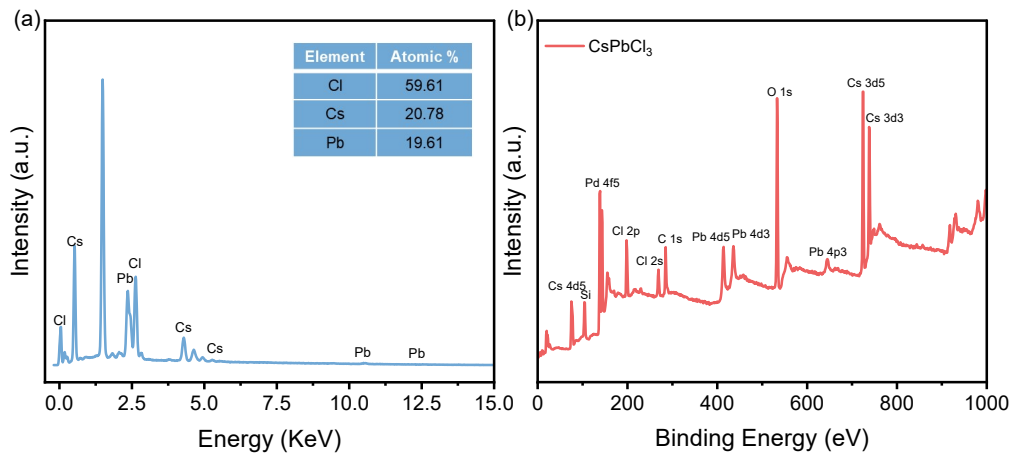

Fig. S3 (a) The EDS spectrum of a single microplate along with the corresponding elemental ratio. MP. (b) The XPS full spectrum of CsPbCl<sub>3</sub> microplate.

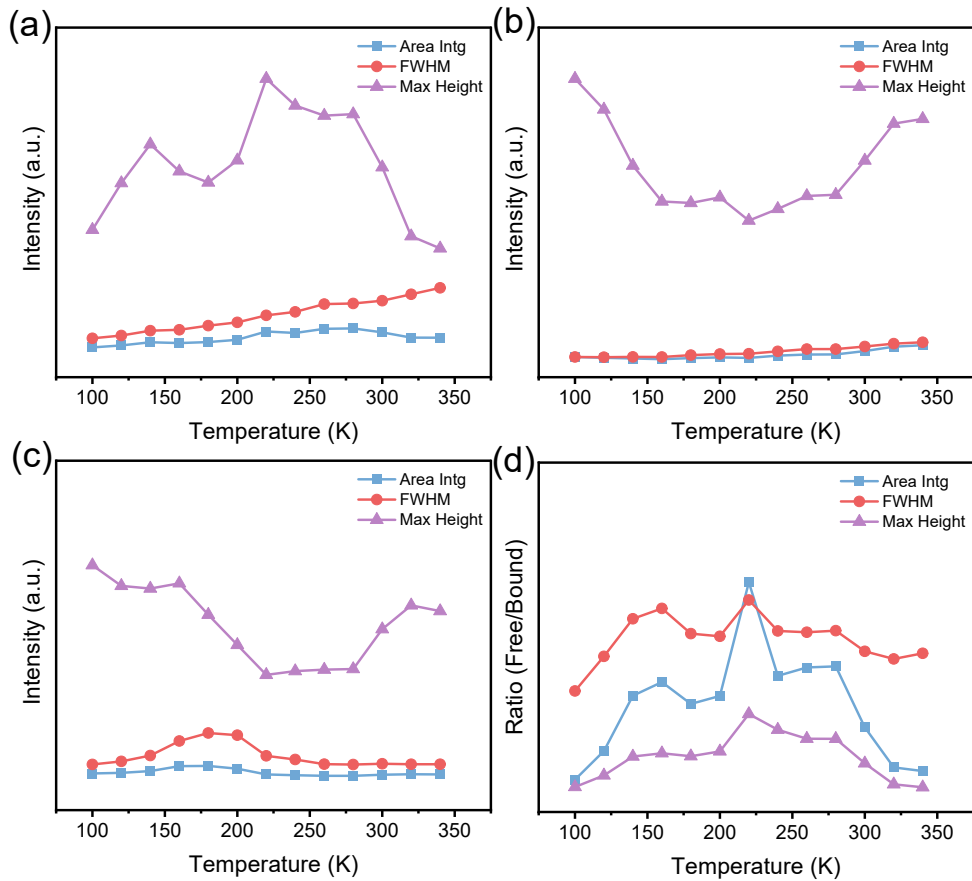

Fig. S4 The intensity, half-width, and peak area of the radiative recombination features corresponding to (a) Free excitons, (b) Bound excitons and (c) Defect state 1 in the PL spectrum change with temperature. (d) The ratio of parameters for free exciton and bound exciton emission peaks obtained from (a) and (b).

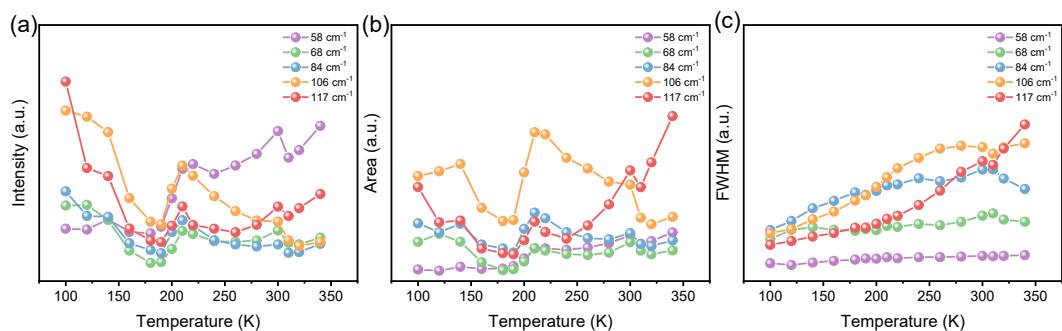

Fig. S5 (a) The peak intensity, (b) half-width, and (c) peak area of various peaks in the Raman spectrum change with temperature.

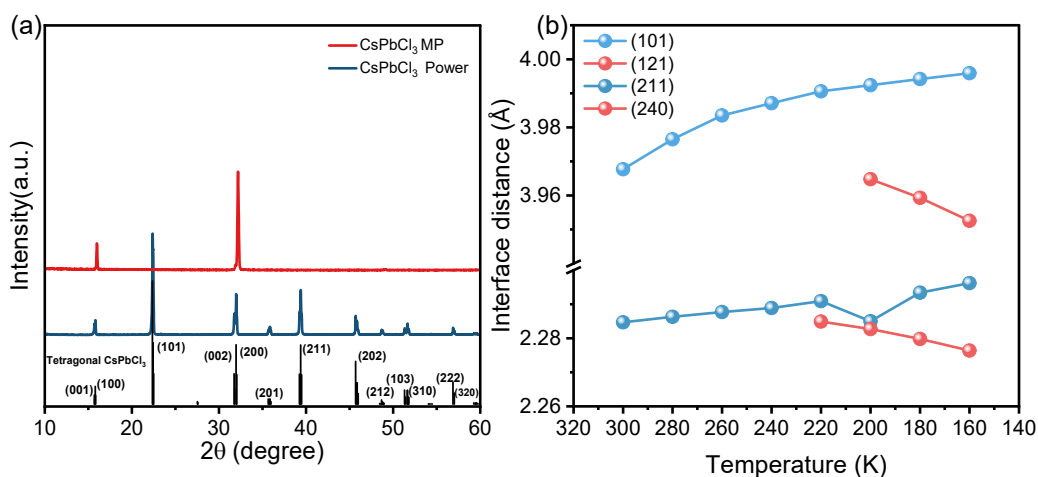

Fig. S6 (a) The XRD patterns of  $\text{CsPbCl}_3$  powder and MP at 300 K. (b) The variation trend of certain interplanar spacings  $d$  for the tetragonal phase (blue line) and orthorhombic phase (red line) with temperature.

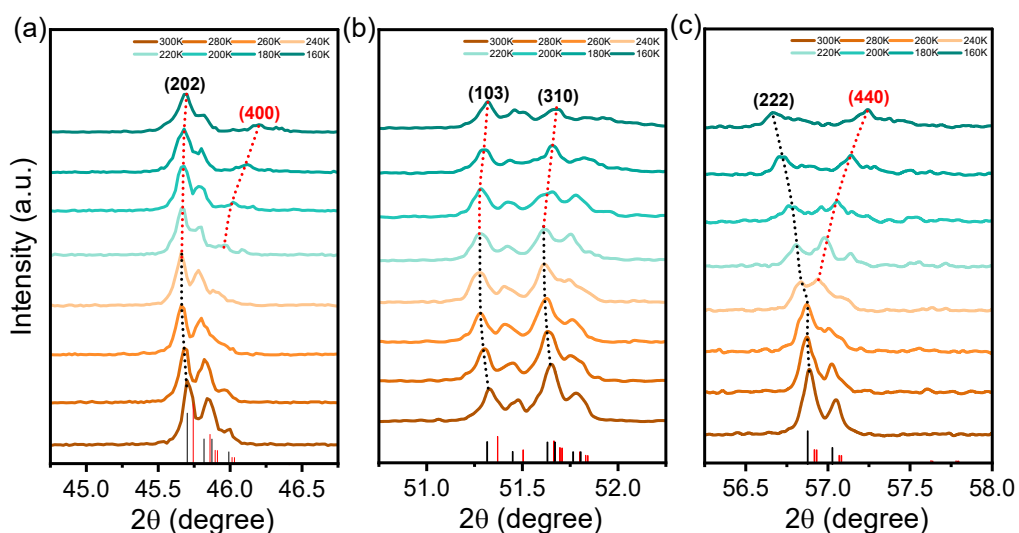

Fig. S7 The magnified local XRD patterns obtained from Fig. 8a.

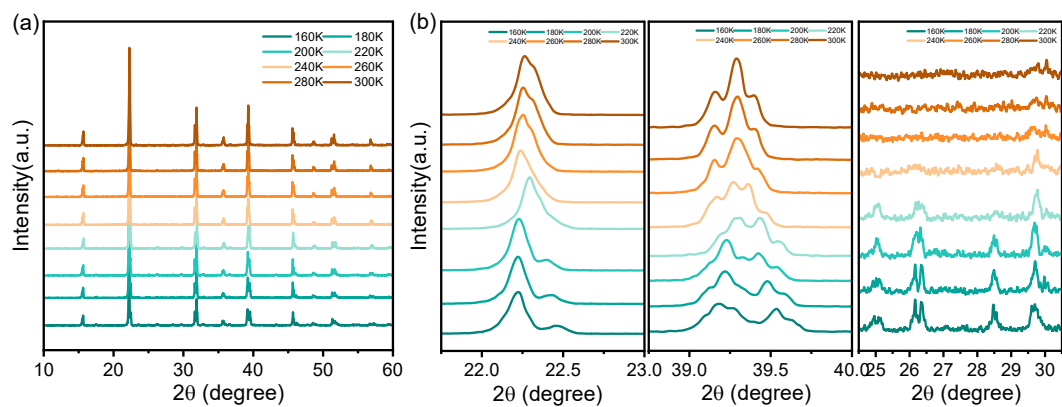

Fig. S8 (a) The temperature-dependent XRD patterns of the CsPbCl<sub>3</sub> powder from 160 K to 300 K. (b) the magnified local XRD patterns obtained from (a).

Table. S1 The detailed fitting parameters in Fig.3,b by the Arrhenius equation.

| Ea (meV) | R <sup>2</sup> | I <sub>0</sub> | A      |
|----------|----------------|----------------|--------|
| 62.0     | 0.9947         | 146993.86      | 913.66 |

Table. S2 Assignments of Raman Bands of CsPbCl<sub>3</sub> at Cryogenic Temperatures ( $\omega_{LO} > \omega_{TO}$ , where  $\omega$  are the frequency of the phonon modes)<sup>1</sup>.

| Raman mode                      | TO <sub>1</sub> | TO <sub>2</sub> | TO <sub>3</sub> | LO <sub>1</sub> | LO <sub>2</sub> | LO <sub>3</sub> |
|---------------------------------|-----------------|-----------------|-----------------|-----------------|-----------------|-----------------|
| Raman shift (cm <sup>-1</sup> ) | (32,52)         | (72,89)         | (110,121)       | 115             | 200             | 375             |

## References:

- 1 M. Liao, B. Shan and M. Li, *The Journal of Physical Chemistry Letters.*, 2019, **10**, 1217-1225.
